# Supplementary material for: Chromosome-level assembly of Lindenbergia philippensis and comparative genomic analyses shed light on genome evolution in Lamiales
Source: Front Plant Sci. 2024 Aug 2;15:1444234. doi: 10.3389/fpls.2024.1444234 (PMC11327160; doi:10.3389/fpls.2024.1444234)
Supplement: Supplementary file 1 [file Table_1.xlsx]

## Sheet: Table S1
Table S1. Genome survey of Lindenbergia philippensis
property	min	max
Heterozygosity	0.00685715	0.00727138
Genome Haploid Length (bp)	412080597	416779442
Genome Repeat Length (bp)	303596480	307058310
Genome Unique Length (bp)	108484117	109721133
Model Fit	0.97439	0.99576
Read Error Rate	0.00428713	0.00428713

## Sheet: Table S2
Table S2. Flow cytometry analyses of L. philippensis
Sample ID	Tomato fluorescence intensity	Sample fluorescence intensity	Ratio	Tomato genome size (Mb)	Sample genome size (Mb)	Average (Mb)
1	92.82	36.91	0.397651	1000	397.651	396.67
2	92.72	36.66	0.395384		395.384
3	92.55	36.74	0.396975		396.975

## Sheet: Table S3
Table S3. Statistics of sequencing data of L. philippensis
Type	Reads number	Base (bp)	average length (bp)	N50 (bp)	Coverage depth (×)*
Nanopore genomic sequencing	8640019	40134666089	5466	7831	101×
Illumina sequencing	536633198	80494979700	150	150	202×
Hi-C	876701228	131505184200	150	150	331×
note: * Based on the estimated genome size of 396.66 Mb

## Sheet: Table S4
Table S4. Statistics on genome assemblies of L. philippensis
Type	contigs		scaffold
	length	number	length	number
N90 (bp)	151133	354	20584726	15
N80 (bp)	412694	186	21270830	13
N70 (bp)	835220	120	22019011	11
N60 (bp)	1282010	80	23302763	9
N50 (bp)	1769251	53	23511984	8
N40 (bp)	2432160	33	25690750	6
N30 (bp)	4344217	20	26883785	4
N20 (bp)	5324868	12	27774833	3
N10 (bp)	7035678	6	41287170	1
Max length (bp)	10060764	-	41287170	-
Total length (bp)	402221156	-	407463502	-

## Sheet: Table S5
Table S5. Mapping statistics of Illumina reads
Type	illumina
Total number of Illumina reads searched	536633198
Number of mapped Illumina reads	518086683
Number of properly mapped Illumina reads	479658098
Illumina reads mapping rate	0.9915
Illumina reads mapping rate (properly paired)	0.9269
Illumina reads coverage rate	0.9505
Coverage at least 5×(%)	0.9374
Coverage at least 10×(%)	0.926
Coverage at least 20×(%)	0.8997

## Sheet: Table S6
Table S6. BUSCO comparative analyses of L. philippensis genome and other species (Dataset: embryophyta_odb10)
Species	Complete BUSCOs	Complete and single-copy BUSCOs	Complete and duplicated BUSCOs	Fragmented BUSCOs	Missing BUSCOs	Total BUSCO groups searched
Vitis vinifera	0.984	0.966	0.018	0.01	0.006	1614
Ophiorrhiza pumila	0.981	0.954	0.027	0.006	0.013	1614
Syringa oblate	0.952	0.796	0.156	0.011	0.037	1614
Forsythia suspense	0.97	0.901	0.069	0.01	0.02	1614
Primulina huaijiensis	0.896	0.756	0.14	0.013	0.091	1614
Plantago major	0.96	0.915	0.045	0.007	0.033	1614
Antirrhinum hispanicum	0.977	0.943	0.034	0.007	0.016	1614
Buddleja alternifolia	0.987	0.916	0.071	0.008	0.005	1614
Sesamum indicum	0.985	0.95	0.035	0.008	0.007	1614
Avicennia marina	0.982	0.932	0.05	0.004	0.014	1614
Petrea volubilis	0.967	0.924	0.043	0.019	0.014	1614
Jacaranda mimosifolia	0.99	0.945	0.045	0.003	0.007	1614
Callicarpa americana	0.992	0.938	0.054	0.003	0.005	1614
Paulownia fortunei	0.989	0.838	0.151	0.005	0.006	1614
Mimulus guttatus	0.963	0.921	0.042	0.012	0.025	1614
Orobanche cumana	0.829	0.801	0.028	0.007	0.164	1614
Lindenbergia philippensis	0.986	0.952	0.034	0.006	0.008	1614

## Sheet: Table S7
Table S7. Source information of species used in this analysis
Species	Karyotype	Family	References
Primulina huaijiensis	2n=34	Gesneriaceae	Feng C, et al. 2020. The genome of a cave plant, Primulina huaijiensis, provides insights into adaptation to limestone karst habitats. New Phytologist 227: 1249-1263. doi: https://doi.org/10.1111/nph.16588
Forsythia suspensa	2n=28	Oleaceae	Li L-F, Cushman SA, He Y-X, Li Y 2020. Genome sequencing and population genomics modeling provide insights into the local adaptation of weeping forsythia. Horticulture Research 7: 130. doi: 10.1038/s41438-020-00352-7
Syringa oblate	2n=46	Oleaceae	Wang Y, et al. 2022c. A chromosome-level genome of Syringa oblata provides new insights into chromosome formation in Oleaceae and evolutionary history of lilacs. The Plant Journal 111: 836-848. doi: https://doi.org/10.1111/tpj.15858
Antirrhinum hispanicum	2n=16	Plantaginaceae	Zhu S, et al. 2023b. The Snapdragon Genomes Reveal the Evolutionary Dynamics of the S-Locus Supergene. Mol. Biol. Evol. 40: msad080. doi: 10.1093/molbev/msad080
Plantago major	2n=12	Plantaginaceae	Lyu S, et al. 2023. Genome assembly of the pioneer species Plantago major L. (Plantaginaceae) provides insight into its global distribution and adaptation to metal-contaminated soil. DNA Research 30: dsad013. doi: 10.1093/dnares/dsad013
Buddleja alternifolia	2n=38	Scrophulariaceae	Ma Y-P, et al. 2021. Genome-wide analysis of butterfly bush (Buddleja alternifolia) in three uplands provides insights into biogeography, demography and speciation. New Phytologist 232: 1463-1476. doi: https://doi.org/10.1111/nph.17637
Sesamum indicum	2n=32	Pedaliaceae	Wang L, et al. 2014. Genome sequencing of the high oil crop sesame provides insight into oil biosynthesis. Genome biology 15: R39. doi: 10.1186/gb-2014-15-2-r39
Avicennia marina	2n=64	Acanthaceae	Friis G, et al. 2021. A high-quality genome assembly and annotation of the gray mangrove, Avicennia marina. G3 Genes|Genomes|Genetics 11: jkaa025. doi: 10.1093/g3journal/jkaa025
Petrea volubilis	2n=34	Verbenaceae	Hamilton JP, Vaillancourt B, Wood JC, Buell CR 2023. Chromosome-scale assembly of the Verbenaceae species Queen’s Wreath (Petrea volubilis L.). BMC Genomic Data 24: 14. doi: 10.1186/s12863-023-01110-z
Jacaranda mimosifolia	2n=36	Bignoniaceae	Wang M, Zhang L, Wang Z 2021. Chromosomal-Level Reference Genome of the Neotropical Tree Jacaranda mimosifolia D. Don. Genome Biology and Evolution 13: evab094. doi: 10.1093/gbe/evab094
Callicarpa americana	2n=34	Lamiaceae	Hamilton JP, et al. 2020. Generation of a chromosome-scale genome assembly of the insect-repellent terpenoid-producing Lamiaceae species, Callicarpa americana. GigaScience 9: giaa093. doi: 10.1093/gigascience/giaa093
Paulownia fortunei	2n=40	Paulowniaceae	Cao Y, et al. 2021. Genomic insights into the fast growth of paulownias and the formation of Paulownia witches' broom. Molecular Plant 14: 1668-1682. doi: https://doi.org/10.1016/j.molp.2021.06.021
Mimulus guttatus	2n=28	Phrymaceae	Hellsten U, et al. 2013. Fine-scale variation in meiotic recombination in Mimulus inferred from population shotgun sequencing. Proceedings of the National Academy of Sciences 110: 19478-19482. doi: 10.1073/pnas.1319032110
Orobanche cumana	2n=38	Orobanchaceae	Xu Y, et al. 2022. Comparative genomics of orobanchaceous species with different parasitic lifestyles reveals the origin and stepwise evolution of plant parasitism. Molecular Plant 15: 1384-1399. doi: https://doi.org/10.1016/j.molp.2022.07.007
Lindenbergia philippensis	2n=32	Orobanchaceae	This study
Vitis vinifera	2n=38	Vitaceae	Jaillon O, et al. 2007. The grapevine genome sequence suggests ancestral hexaploidization in major angiosperm phyla. Nature 449: 463-467. doi: 10.1038/nature06148
Ophiorrhiza pumila	2n=22	Rubiaceae	Rai A, et al. 2021. Chromosome-level genome assembly of Ophiorrhiza pumila reveals the evolution of camptothecin biosynthesis. Nature communications 12: 405. doi: 10.1038/s41467-020-20508-2

## Sheet: Table S8
Table S8. Repeat annotation of L. philippensis genome and other species
	Vitis vinifera		Ophiorrhiza pumila		Syringa oblate		Forsythia suspense		Primulina huaijiensis		Plantago major		Antirrhinum hispanicum		Buddleja alternifolia		Sesamum indicum		Avicennia marina		Petrea volubilis		Jacaranda mimosifolia		Callicarpa americana		Paulownia fortunei		Mimulus guttatus		Orobanche cumana		Lindenbergia philippensis
Genome size (bp)	475604073		440319191		1122505626		737550702		425197575		592229000		487852927		853754563		275059498		493608553		480227434		707411631		506362408		511771795		331806910		1463172293		407463502
Type	Length (bp)	Percentage of genome (%)	Length (bp)	Percentage of genome (%)	Length (bp)	Percentage of genome (%)	Length (bp)	Percentage of genome (%)	Length (bp)	Percentage of genome (%)	Length (bp)	Percentage of genome (%)	Length (bp)	Percentage of genome (%)	Length (bp)	Percentage of genome (%)	Length (bp)	Percentage of genome (%)	Length (bp)	Percentage of genome (%)	Length (bp)	Percentage of genome (%)	Length (bp)	Percentage of genome (%)	Length (bp)	Percentage of genome (%)	Length (bp)	Percentage of genome (%)	Length (bp)	Percentage of genome (%)	Length (bp)	Percentage of genome (%)	Length (bp)	Percentage of genome (%)
DNA	53127388	11.1705	22619634	5.1371	90784311	8.08765	74952191	10.1623	15099134		44695930	7.54707	45471526	9.32075	59918044	7.01818	12606095	4.58304	25384132	5.14256	52479070	10.928	61914611	8.75227	34136607	6.74154	24751498	4.83643	31868094	9.60441	72876731	4.98074	27009179	6.62861
LINE	24364168	5.12278	15955215	3.62356	16294921	1.45166	10128654	1.37328	3576862		16140260	2.72534	16932802	3.47088	18152477	2.12619	10247871	3.72569	3716496	0.752924	10720837	2.23245	5793672	0.818996	3812096	0.752839	3559889	0.695601	5029230	1.51571	24556314	1.67829	3493390	0.85735
SINE	425	8.9e-05	1290	0.000293	5391	0.00048	2765	0.000375	680		26114	0.004409	1888	0.000387	178721	0.020934	612	0.000222	134	2.7e-05	684348	0.142505	2217	0.000313	41074	0.008112	321007	0.062725	8351	0.002517	153174	0.010469	77122	0.0189273
LTR	146236422	30.7475	192876567	43.8038	552345209	49.2065	270741051	36.7081	208499437		284205249	47.9891	155773947	31.9305	483625846	56.6469	36775958	13.3702	113006884	22.894	113301254	23.5932	254143590	35.9258	209581600	41.3896	171994312	33.6076	96547921	29.0976	1051826640	71.8867	161701612	39.6849
Unknown	38370739	8.06779	62779675	14.2578	163424791	14.5589	147534713	20.0033	41149664		98722756	16.6697	75729377	15.523	95349018	11.1682	66881029	24.3151	89503598	18.1325	116080235	24.1719	159891123	22.6023	69633850	13.7518	74137155	14.4864	66085693	19.9169	133575048	9.12914	64296281	15.7796
Total	259270958	54.514	280697551	63.7487	778518148	69.3554	480839165	65.194	261401270		426508292	72.0175	283349172	58.0809	639526405	74.9075	123781035	45.0015	224256655	45.4321	281153684	58.5459	458979384	64.8815	306301889	60.4906	269054982	52.5732	191515498	57.719	1242588353	84.9243	256702698	61.4

## Sheet: Table S9
Table S9. The distribution of protein-coding genes in L. philippensis and sixteen other species
Species	gene_num	average_mRNA_len	total_exon_num	average_exon_len	average_cds_len	average_exon_num	total_intro_len
Antirrhinum hispanicum	43742	2769.99	197429	244.479	1103.45	4.51349	72897621
Avicennia marina	31121	3222.7	162810	227.457	1189.94	5.23152	63261529
Buddleja alternifolia	29352	4496.61	158037	238.311	1283.12	5.3842	81652936
Callicarpa americana	32164	3699.81	156257	244.998	1190.23	4.85813	62280927
Forsythia suspense	33063	4238.76	170323	231.418	1192.14	5.15147	85891779
Jacaranda mimosifolia	30507	3441.77	159851	234.869	1230.67	5.23981	67454107
Mimulus guttatus	34838	2946.22	188105	225.98	1220.16	5.39942	44125805
Orobanche cumana	42062	2828.63	150126	284.481	1015.36	3.56916	76270062
Ophiorrhiza pumila	32374	3117.54	144875	243.587	1090.06	4.47504	51448543
Paulownia fortunei	31673	3732.02	171505	233.634	1265.09	5.41486	78134874
Primulina huaijiensis	26881	3736.43	145117	229.292	1237.83	5.3985	54882249
Plantago major	29221	3184.11	153693	227.33	1195.68	5.25968	58103938
Petrea volubilis	37610	3076.65	169773	236.195	1066.19	4.51404	61777229
Sesamum indicum	23988	4029.49	134425	239.852	1344.09	5.60384	48503058
Syringa oblate	53944	5673.89	267904	223.017	1107.58	4.96634	246325097
Vitis vinifera	25187	6546.27	133122	264.007	1395.37	5.28535	107274401
Lindenbergia philippensis	25693	3800.27	137874	232.172	1245.89	5.36621	54754879

## Sheet: Table S10
Table S10. Functional annotation of the predicted genes in L. philippensis
KEGG	17325	67.43(%)
NR	23222	90.38(%)
TrEMBL	23526	91.57(%)
UniProt	17105	66.57(%)
PFAM	19334	75.25(%)
Total	23584	91.79(%)
Total gene number	25693	-

[truncated: 3 more sheets: Table S11, Table S12, Table S13]
